# Supplementary material
Source: Springer Nature journal article supplement (https://www.springermedizin.de/resource/supplementary/12887_2012_702_MOESM2_ESM.pdf/9475522)
Supplement: MOESM2 [file 9475522]

Patients with CD  
N = 44

```
graph TD; A[Patients with CD  
N = 44] --> B[No Disease Progression  
(N=11)]; A --> C["Disease Progression (N = 33)  
TI = 14  
UGI = 10 (isolated UGI = 4)  
IC = 10  
C = 5"]; style A fill:#fff,stroke:#000; style B fill:#fff,stroke:#000; style C fill:#fff,stroke:#000;
```

No Disease  
Progression (N=11)

Disease Progression (N = 33)

TI = 14

UGI = 10 (isolated UGI = 4)

IC = 10

C = 5
